# Supplementary material for: Surface Export of GAPDH/SDH, a Glycolytic Enzyme, Is Essential for Streptococcus pyogenes Virulence
Source: PubMed Central journal article supplement — mBio. 2011 May 31;2(3):e00068-11. doi: 10.1128/mBio.00068-11 (PMC3104492; doi:10.1128/mbio.00068-11), 2011-05-31
Supplement: mBio.00068-11-st1.pdf [file mBio.00068-11-st1.pdf]

Table-S1: Primers used in real-time PCR

| <b>Gene</b>            | <b>Forward</b>             | <b>Reverse</b>              |
|------------------------|----------------------------|-----------------------------|
| SPy1152( <i>gyrA</i> ) | TTCGTATGGCTCAGTGGTTTAGTT   | CTGGTTCTCTTTTCGCTTCCATCGT   |
| SPy1962( <i>proS</i> ) | GGGTGGTTCTTGACAAGTCTATTGCG | TTCTGCCAAGGCATCTTCAGCA      |
| SPy0124                | GTTTTTGTCTTGCTGCGTCA       | CTCCTCAGCTTATCGGATGC        |
| SPy0128                | GTTACGCGGGAGACTGTTGT       | GTCATCGGTGTGTTCAAAGC        |
| SPy0148                | GCCATCGACAACAAGCAGCTCAAA   | AGGAATCGTTCCAACCTTTGCCGA    |
| SPy0165                | CGTACGCTGTTAGTGGCAA        | GGGACGCAAACCTTGTAGGAA       |
| SPy0167                | AGCTCCGCCACTCTTTGTGAGTAA   | CTCTGCAGCATCTCCTCC          |
| SPy0252                | AAATGCTCAAAGATGCTGGCGTCC   | TGGTCACCACCTTGACCATTAGCA    |
| SPy0336                | TTGAGGTCAATGGTCGTGAAGGGT   | GGTCTAAACCTGCAACCACATCCA    |
| SPy0337                | GTCAGCCATGAATTACGAACACCG   | TGTCCCTCAAATGAGCCTTGTACG    |
| SPy0518                | AGGTGGTCTCACAGTTTATGGGCT   | TCATCTTCACATCCCTGACCGCAA    |
| SPy0631                | ATGACGCGAGTTGATGAGCGTTTG   | TAGCGACGATAACGGTGTTCAGT     |
| SPy0711                | AAGCGGCAGAATCGAAATTGGCAC   | TCTAGTCCCTTCATTTGGTGAGTC    |
| SPy0712                | GCAATGACAGCCTGGCTAAACACA   | TCGAGGCACTACTTCATTGCCACT    |
| SPy0737                | TGGCTTCCAGACATCTCTGATGGA   | TTCGAAGGAATAGCCGGCACTGAT    |
| SPy0738                | GCTGCTGTTGCTGCTGTACTACTT   | GCGTATAACTTCGCTACCACCTT     |
| SPy1294                | TTCCTTTGAATCAGGACCGTGGGA   | TTTAGCTGGTGCTTGGTTGACTGC    |
| SPy1295                | ACATCCAAGTTGCTGTTGATGGCG   | GCGACCATTTGTAAGTGTGGCAAG    |
| SPy1302                | TACCATGGAGGTGATTGGCAAGGA   | AGCCCAATACCCATGATATGCAGC    |
| SPy1306                | GGTTTAATTGCCGGTTATGGCGGT   | TGCCATACCACTGTTTCGCGTAGT    |
| SPy1373                | ACTCAGGAGCAACAGCGGCTTATG   | TCAACATCCGCATGCTAACAGCAC    |
| SPy1600                | ACGAGAAGAGCGGTTAGATTGCCT   | TCAGGATAAAGATCGCGCCACAGT    |
| SPy1625                | TTGTGGCACATTGTGGTTCT       | CCAAAGCGACGATTCAAAGT        |
| SPy1626                | TTTAGCAGACGGTATGGGTGGC     | GTCGTTCCCATTCTTTAAAGTCTTCTG |
| SPy1718                | TTCAGCAGGTGGAGGTTTAGCCTT   | AAGAACGAGCTGCTTTGGTTGAGG    |
| SPy1755                | ACGTTAGGGACAGTAACCACTAGC   | GCACCAATGCCTGCATCTCTTC      |
| SPy1815                | CTCTTTGGCATTGCAGGAACTGGT   | ACAGCTGGTAACGGAAGGGTTTCT    |
| SPy1979                | ACGGCAAGGTCTACTTTGCTGACA   | TTGAGCCCTGGTCTGAAATCGTCA    |
| SPy2010                | GAAGCGTGGCGCTTAACAGACAAA   | ACCTTATCATTGACCCACTCGCCA    |
| SPy2016                | ATGACTGGCCTGAAGATGACTGGT   | TGCTTCTCCATATGGTGGTCTCGT    |
| SPy2018                | TTAGCGATAGACCAAGCGAGTCAG   | GCTTTGACGACTTGCGTCTGAGAT    |
| SPy2019                | GACCTTTCACGCTTGTTTCACCTC   | GTGACGCTGAGATTGAGCCTGATT    |
| SPy2039                | TTCTGCAGGTAGCTCTCGTGTTT    | TCGATAACAAAGGCATGTCCGCC     |
| SPy2042                | ATCGATTCCGATGTTTGTCA       | AGGCCAATAATGCCATCAAA        |
| SPy2200                | GCCACATGACTATAAAGTTGCTGCTG | TTGACAAGGGAACGGTGAACGA      |
| SPy2201                | CGGAACTGGTCATTATTGCCACAC   | GAGTTGCATGGCTATTAACGCTTAG   |
