# Supplementary material for: Surface Export of GAPDH/SDH, a Glycolytic Enzyme, Is Essential for Streptococcus pyogenes Virulence
Source: PubMed Central journal article supplement — mBio. 2011 May 31;2(3):e00068-11. doi: 10.1128/mBio.00068-11 (PMC3104492; doi:10.1128/mbio.00068-11), 2011-05-31
Supplement: mBio.00068-11-st2.pdf [file mBio.00068-11-st2.pdf]

**Table-S2: Primers used for cloning genes**

| <b>Primer name</b> | <b>Nucleotide Sequence</b>                           |
|--------------------|------------------------------------------------------|
| CovR-NdeI-F        | * CCGGCC <u><i>CATATG</i></u> ACAAAGAAAATTTTAATTATTG |
| CovR-BamHI-R       | CCGC <u><i>GGATCCTT</i></u> TATTTCTCACGAATAACGT      |
| CcpA-NdeI-F        | CGAATTCC <u><i>CATATG</i></u> AATACAGATGATCC         |
| CcpA-BamHI-R       | CGCG <u><i>GGATCCTT</i></u> ACTTAGTTGTCCCA           |

\* Enzyme sites are underlined and italicized
