# Supplementary material for: Surface Export of GAPDH/SDH, a Glycolytic Enzyme, Is Essential for Streptococcus pyogenes Virulence
Source: PubMed Central journal article supplement — mBio. 2011 May 31;2(3):e00068-11. doi: 10.1128/mBio.00068-11 (PMC3104492; doi:10.1128/mbio.00068-11), 2011-05-31
Supplement: mBio.00068-11-st3.pdf [file mBio.00068-11-st3.pdf]

Table- S3: Microarray-based differential gene expression analysis for M1-SDH<sub>HBtail</sub> vs M1-WT (M1-SF370) (GSE# 15231).

| ORF No.                                      | Gene        | Product                                                                | Median Log <sub>2</sub> ratio | P value  |
|----------------------------------------------|-------------|------------------------------------------------------------------------|-------------------------------|----------|
| <b>Amino acid transport and metabolism</b>   |             |                                                                        |                               |          |
| SPy0323                                      | braB        | putative branched-chain amino acid transport protein                   | 2.56                          | 0.007249 |
| SPy1542                                      | -           | putative Xaa-His dipeptidase                                           | -5.29                         | 1.48E-07 |
| SPy1544                                      | arcB        | putative ornithine transcarbamylase                                    | -5.07                         | 4.16E-06 |
| SPy1547                                      | sagP (arcA) | streptococcal antitumor protein (possible arginine deiminase)          | -4.51                         | 0.001068 |
| SPy2189                                      | sdhB        | putative L-serine dehydratase beta subunit                             | -1.26                         | 0.008149 |
| SPy2190                                      | sdhA        | putative L-serine dehydratase alpha subunit                            | -2.13                         | 0.013243 |
| SPy0183                                      | opuAA       | putative glycine betaine/proline ABC transporter (ATP-binding protein) | 2.47                          | 6.18E-05 |
| SPy0184                                      | opuABC      | putative glycine-betaine binding permease protein                      | 1.65                          | 0.001265 |
| SPy0324                                      | -           | putative sodium/dicarboxylate symporter                                | 2                             | 0.000342 |
| SPy1541                                      | arcC        | putative carbamate kinase                                              | -4.97                         | 8.37E-07 |
| SPy1549                                      | ahrC.2      | putative arginine repressor                                            | -1.59                         | 0.045987 |
| <b>Carbohydrate transport and metabolism</b> |             |                                                                        |                               |          |
| SPy0146                                      | -           | putative regulatory protein                                            | -2.51                         | 0.004096 |
| SPy0252                                      | -           | putative sugar transporter sugar binding lipoprotein                   | -1.89                         | 0.023852 |
| SPy0854                                      | fruB        | putative fructose-1-phosphate kinase                                   | -4.56                         | 0.008172 |
| SPy0855                                      | -           | putative fructose-specific enzyme II, PTS system BC component          | -2.27                         | 0.003793 |
| SPy1057                                      | -           | hypothetical protein                                                   | -5.51                         | 9.66E-05 |
| SPy1058                                      | -           | putative phosphotransferase system (PTS), enzyme II component B        | -5.6                          | 0.000223 |
| SPy1059                                      | -           | putative phosphotransferase system (PTS), enzyme II, component C       | -5.39                         | 9.37E-05 |
| SPy1060                                      | -           | putative phosphotransferase system (PTS), enzyme II component D        | -4.91                         | 3.44E-05 |
| SPy1291                                      | glgP        | putative glycogen phosphorylase                                        | -2.64                         | 0.037309 |
| SPy1292                                      | malM        | putative 4-alpha-glucanotransferase                                    | -5.13                         | 0.003174 |
| SPy1294                                      | -           | putative maltose/maltodextrin-binding protein                          | -4.07                         | 0.006518 |
| SPy1295                                      | malF        | putative maltose/maltodextrin ABC transport system (permease)          | -3.85                         | 0.018853 |
| SPy1296                                      | malG        | putative maltose/maltodextrin ABC transport system (permease)          | -2.25                         | 0.02073  |
| SPy1299                                      | malD        | putative maltodextrin transport system permease                        | -2.76                         | 0.000875 |
| SPy1301                                      | malC        | maltodextrin transport system permease                                 | -3.57                         | 0.000393 |
| SPy1304                                      | amyB        | putative cyclomaltodextrinase                                          | -4.19                         | 0.000302 |
| SPy1306                                      | malX        | maltose/maltodextrin-binding protein                                   | -5.46                         | 0.000544 |
| SPy1373                                      | ptsH        | putative phosphotransferase system phosphohistidine-containing protein | -1.6                          | 0.002916 |
| SPy1399                                      | nagB        | putative N-acetylglucosamine-6-phosphate isomerase                     | 2                             | 0.000618 |
| SPy1503                                      | -           | putative phosphomannomutase                                            | -2.31                         | 0.031433 |
| SPy1599                                      | -           | putative beta-glucosidase                                              | -0.98                         | 0.024817 |
| SPy1678                                      | -           | putative transaldolase                                                 | -1.71                         | 0.030279 |
| SPy1704                                      | lacD.1      | putative tagatose 1,6-diphosphate aldolase                             | -1.65                         | 0.010332 |
| SPy1707                                      | lacB.1      | putative galactose-6-phosphate isomerase                               | -2.84                         | 1.49E-05 |
| SPy1708                                      | lacA.1      | putative galactose-6-phosphate isomerase                               | -2.21                         | 0.001005 |
| SPy1709                                      | -           | putative PTS system, enzyme IIC component                              | -2.88                         | 1.44E-05 |
| SPy1711                                      | -           | putative PTS system, enzyme IIA component                              | -2.24                         | 0.024784 |
| SPy1916                                      | lacG        | putative phospho-beta-D-galactosidase                                  | -1.65                         | 0.000667 |
| SPy1917                                      | lacE        | putative PTS system, lactose-specific component IIBC                   | -1.77                         | 0.005795 |
| SPy1919                                      | lacD.2      | putative tagatose 1,6-diphosphate aldolase                             | -1.8                          | 0.019259 |
| SPy1922                                      | lacB.2      | putative galactose-6-phosphate isomerase (B subunit)                   | -1.71                         | 0.01556  |
| SPy1923                                      | lacA.2      | galactosidase acetyltransferase                                        | -2.47                         | 0.000756 |
| SPy1972                                      | pulA        | putative pullulanase                                                   | -1.16                         | 0.023886 |
| SPy1973                                      | dexB        | dextran glucosidase                                                    | -2.26                         | 0.001396 |
| SPy2052                                      | -           | putative PTS system, enzyme III                                        | -1.8                          | 0.00055  |

|                                                  |      |                                                                   |       |          |
|--------------------------------------------------|------|-------------------------------------------------------------------|-------|----------|
| SPy2096                                          | dexS | putative dextran glucosidase                                      | -1.25 | 0.023587 |
| SPy2097                                          | -    | putative PTS system enzyme II                                     | -1.38 | 0.003626 |
|                                                  |      | Cell division and chromosome partitioning                         |       |          |
| SPy2165                                          | -    | hypothetical protein                                              | 1.55  | 0.004494 |
|                                                  |      | Cell envelope biogenesis, outer membrane                          |       |          |
| SPy2201                                          | hasB | UDP-glucose 6-dehydrogenase                                       | -4.77 | 1.72E-09 |
| SPy2202                                          | hasC | UDP-glucose pyrophosphorylase                                     | -4.32 | 1.50E-08 |
| <b>Cell motility and secretion</b>               |      |                                                                   |       |          |
| SPy1976                                          | msmK | multiple sugar-binding ABC transport system (ATP-binding protein) | -2.17 | 0.025933 |
| Coenzyme metabolism                              |      |                                                                   |       |          |
| SPy1063                                          | -    | putative periplasmic-iron-binding protein                         | -2.12 | 0.011472 |
| SPy1190                                          | citX | conserved hypothetical protein                                    | -1.01 | 0.026246 |
| SPy1214                                          | lplA | putative lipoate-protein ligase                                   | -1.29 | 0.034975 |
| <b>DNA replication, recombination and repair</b> |      |                                                                   |       |          |
| SPy1196                                          | -    | putative integrase/recombinase                                    | 1.77  | 0.012592 |
| SPy1336                                          | -    | putative transposase - IS861 associated                           | 1.95  | 0.029864 |
| SPy1415                                          | deaD | putative ATP-dependent RNA helicase                               | 1.32  | 0.001425 |
| SPy1563                                          | -    | conserved hypothetical protein                                    | -2.44 | 0.000995 |
| <b>Energy production and conversion</b>          |      |                                                                   |       |          |
| SPy0148                                          | ntpl | V-type Na <sup>+</sup> -ATPase subunit I                          | -2.48 | 0.002983 |
| SPy0149                                          | ntpK | V-type Na <sup>+</sup> -ATPase subunit K                          | -3.36 | 0.000355 |
| SPy0150                                          | ntpE | putative V-type Na <sup>+</sup> -ATPase subunit E                 | -3.77 | 7.45E-05 |
| SPy0151                                          | ntpC | putative V-type Na <sup>+</sup> -ATPase subunit C                 | -3.79 | 0.000349 |
| SPy0154                                          | ntpA | putative V-type Na <sup>+</sup> -ATPase alpha subunit             | -4.37 | 0.000169 |
| SPy0155                                          | ntpB | putative V-type Na <sup>+</sup> -ATPase subunit B                 | -4.33 | 0.00093  |
| SPy0157                                          | ntpD | putative V-type Na <sup>+</sup> -ATPase subunit D                 | -3.71 | 0.000102 |
| SPy0414                                          | lctO | putative lactate oxidase                                          | -1.14 | 0.042237 |
| SPy0739                                          | sagB | streptolysin S associated ORF                                     | -4.18 | 0.000177 |
| SPy0755                                          | atpB | putative proton-translocating ATPase a subunit                    | 1.12  | 0.034206 |
| SPy0757                                          | atpH | putative proton-translocating ATPase, delta subunit               | 1.51  | 0.011097 |
| SPy0759                                          | atpG | putative proton-translocating ATPase, gamma subunit               | 1.4   | 0.021545 |
| SPy1128                                          | pta  | putative phosphotransacetylase                                    | -1.63 | 0.025472 |
| SPy1849                                          | pfl  | putative pyruvate formate-lyase                                   | -2.82 | 0.001851 |
| <b>Function unknown</b>                          |      |                                                                   |       |          |
| SPy0136                                          | -    | hypothetical protein                                              | -5.42 | 7.69E-09 |
| SPy0147                                          | -    | hypothetical protein                                              | -4.55 | 0.000205 |
| SPy0166                                          | -    | hypothetical protein                                              | -2.22 | 0.002246 |
| SPy0169                                          | -    | hypothetical protein                                              | -2.92 | 7.95E-06 |
| SPy0170                                          | -    | hypothetical protein                                              | -5.58 | 3.55E-11 |
| SPy0174                                          | -    | conserved hypothetical protein                                    | -1.1  | 0.023672 |
| SPy0227                                          | -    | hypothetical protein                                              | 1.46  | 0.025308 |
| SPy0373                                          | -    | conserved hypothetical protein                                    | 1.3   | 0.031543 |
| SPy0421                                          | -    | conserved hypothetical protein                                    | 2.01  | 0.000696 |
| SPy0428                                          | -    | conserved hypothetical protein                                    | -1.29 | 0.003114 |
| SPy0430                                          | -    | hypothetical protein                                              | -4.36 | 3.64E-11 |
| SPy0431                                          | -    | hypothetical protein                                              | -1.66 | 0.003665 |
| SPy0433                                          | -    | hypothetical protein                                              | -3.29 | 1.49E-05 |
| SPy0435                                          | -    | hypothetical protein                                              | -3.25 | 9.47E-07 |
| SPy0437                                          | -    | hypothetical protein                                              | -2.18 | 0.005232 |
| SPy0740                                          | sagC | streptolysin S associated ORF                                     | -2.81 | 1.42E-05 |
| SPy0741                                          | -    | hypothetical protein                                              | -2.46 | 6.08E-05 |
| SPy0743                                          | -    | hypothetical protein                                              | -2.59 | 5.49E-06 |
| SPy0798                                          | -    | conserved hypothetical protein                                    | 1.26  | 0.012063 |
| SPy0861                                          | -    | hypothetical protein                                              | -2.95 | 2.77E-07 |

|                                            |        |                                                                       |       |          |
|--------------------------------------------|--------|-----------------------------------------------------------------------|-------|----------|
| SPy0914                                    | -      | hypothetical protein                                                  | 1.11  | 0.016859 |
| SPy0916                                    | -      | hypothetical protein                                                  | 1.11  | 0.003215 |
| SPy1017                                    | -      | hypothetical protein                                                  | 1.33  | 0.03516  |
| SPy1298                                    | malA   | putative maltodextrase utilization protein                            | -2.22 | 0.000682 |
| SPy1326                                    | -      | conserved hypothetical protein                                        | -1.03 | 0.017117 |
| SPy1339                                    | -      | hypothetical protein                                                  | -1.29 | 0.015768 |
| SPy1395                                    | -      | putative transcription factor                                         | 2.07  | 0.000347 |
| SPy1543                                    | -      | conserved hypothetical protein                                        | -3.61 | 1.40E-05 |
| SPy1562                                    | -      | conserved hypothetical protein                                        | -3.16 | 1.64E-05 |
| SPy1564                                    | -      | conserved hypothetical protein                                        | -1.91 | 0.005807 |
| SPy1565                                    | -      | conserved hypothetical protein                                        | -3.26 | 9.59E-06 |
| SPy1566                                    | -      | conserved hypothetical protein                                        | -1.7  | 0.002474 |
| SPy1680                                    | -      | putative transcriptional regulatory protein                           | -1.4  | 0.022179 |
| SPy1710                                    | -      | putative PTS system, enzyme IIB component                             | -1.97 | 0.002762 |
| SPy1985                                    | -      | hypothetical protein                                                  | -1.96 | 0.004481 |
| SPy2209                                    | -      | conserved hypothetical protein                                        | 1.19  | 0.006229 |
| <b>General function prediction only</b>    |        |                                                                       |       |          |
| SPy0044                                    | adhA   | putative alcohol dehydrogenase I                                      | -4.88 | 0.001049 |
| SPy0207                                    | -      | putative biotin synthase                                              | 2.23  | 0.000258 |
| SPy0285                                    | -      | putative ABC transporter (ATP-binding protein)                        | 1.53  | 0.032121 |
| SPy0519                                    | -      | conserved hypothetical protein                                        | -1.55 | 0.008426 |
| SPy0742                                    | -      | hypothetical protein                                                  | -2.94 | 1.47E-05 |
| SPy0745                                    | sagH   | ABC transporter (ATP-binding protein) - streptolysin S associated ORF | -2.66 | 5.08E-05 |
| SPy0746                                    | -      | putative ABC transporter (ATP-binding protein)                        | -2.68 | 0.000295 |
| SPy0747                                    | -      | conserved hypothetical protein                                        | -1.9  | 0.0072   |
| SPy1113                                    | -      | putative acid phosphatase (class B)                                   | -4.03 | 9.73E-05 |
| SPy1567                                    | -      | conserved hypothetical protein                                        | -2.21 | 0.001016 |
| SPy1681                                    | -      | putative NADH peroxidase                                              | -1.34 | 0.005186 |
| SPy1736                                    | -      | conserved hypothetical protein                                        | 2.38  | 0.000581 |
| SPy1737                                    | -      | conserved hypothetical protein                                        | 1.02  | 0.038873 |
| SPy1751                                    | fabK   | putative trans-2-enoyl-ACP reductase II                               | 1.95  | 0.001007 |
|                                            |        | Inorganic ion transport and metabolism                                |       |          |
| SPy1424                                    | -      | putative formate dehydrogenase                                        | -1.12 | 0.009066 |
| <b>Lipid metabolism</b>                    |        |                                                                       |       |          |
| SPy0374                                    | -      | conserved hypothetical protein                                        | 1.48  | 0.018614 |
| SPy1718                                    | -      | putative esterase                                                     | -1.98 | 0.001495 |
| SPy1743                                    | accA   | putative acetyl-CoA carboxylase alpha subunit                         | 1.23  | 0.003546 |
| SPy1744                                    | accD   | putative acetyl-CoA carboxylase beta subunit                          | 1.88  | 0.015576 |
| SPy1745                                    | accC   | putative acetyl-CoA carboxylase biotin carboxylase subunit            | 2.2   | 0.002519 |
| SPy1746                                    | fabZ   | putative beta-hydroxyacyl-ACP dehydratase                             | 2.19  | 0.017344 |
| SPy1747                                    | accB   | putative biotin carboxyl carrier protein                              | 2.05  | 0.000841 |
| SPy1748                                    | fabF   | putative beta-ketoacyl-ACP synthase II                                | 1.76  | 0.002773 |
| SPy1750                                    | fabD   | putative malonyl CoA-acyl carrier protein transacylase                | 2.05  | 0.000326 |
| SPy1753                                    | acpP   | putative acyl carrier protein                                         | 2.13  | 0.000668 |
| SPy1754                                    | fabH   | putative beta-ketoacyl-[ACP] synthase III                             | 1.51  | 0.001933 |
| SPy1758                                    | phaB   | putative enoyl CoA hydratase                                          | 1.63  | 0.001134 |
| <b>Nucleotide transport and metabolism</b> |        |                                                                       |       |          |
| SPy0831                                    | pyrP   | putative uracil permease                                              | 0.99  | 0.037869 |
| SPy0900                                    | pyrF   | putative orotidine-5'-decarboxylase PyrF                              | 1.16  | 0.041346 |
| SPy1375                                    | nrdE.2 | putative ribonucleotide reductase alpha-chain                         | 1.15  | 0.023049 |
| SPy2206                                    | guaB   | inosine monophosphate dehydrogenase                                   | 1.15  | 0.01234  |
| <b>Phage</b>                               |        |                                                                       |       |          |
| SPy0660                                    | -      | hypothetical protein, phage associated                                | 1.93  | 0.012448 |

|                                                                     |      |                                                                |       |          |
|---------------------------------------------------------------------|------|----------------------------------------------------------------|-------|----------|
| SPy0667                                                             | -    | hypothetical protein, phage associated                         | 1.09  | 0.033773 |
| SPy0967                                                             | -    | conserved hypothetical protein - phage associated              | 1.45  | 0.006787 |
| SPy0968                                                             | -    | hypothetical protein                                           | -1    | 0.003845 |
| SPy0971                                                             | -    | putative terminase, small subunit - phage associated           | -1.49 | 0.002885 |
| SPy0978                                                             | -    | hypothetical protein                                           | -1.4  | 0.047899 |
| SPy0979                                                             | -    | hypothetical protein                                           | 2.26  | 0.00205  |
| SPy0980                                                             | -    | putative antirepressor - phage associated                      | 2     | 0.000203 |
| SPy1437                                                             | -    | hypothetical protein                                           | 1.94  | 0.007943 |
| SPy2122                                                             | int4 | putative integrase - phage associated                          | 1.38  | 0.015163 |
| SPy2129                                                             | -    | hypothetical protein                                           | 1.15  | 0.049082 |
| SPy2132                                                             | -    | hypothetical protein                                           | 1.67  | 0.014003 |
| SPy2134                                                             | -    | hypothetical protein                                           | 1.71  | 0.020079 |
| SPy2136                                                             | -    | putative DNA primase - phage associated                        | 1.37  | 0.000848 |
| <b>Posttranslational modification, protein turnover, chaperones</b> |      |                                                                |       |          |
| SPy0379                                                             | pflC | putative pyruvate-formate lyase activating enzyme              | -1.56 | 0.011661 |
| SPy0416                                                             | prtS | putative cell envelope proteinase                              | -2.93 | 1.67E-06 |
| SPy1557                                                             | msrA | putative peptide methionine sulfoxide reductase                | 1.43  | 0.006847 |
| SPy1558                                                             | -    | hypothetical protein                                           | 3.29  | 0.000235 |
| SPy1559                                                             | ccdA | putative cytochrome C-type biogenesis protein                  | 2.35  | 0.001259 |
| <b>Secondary metabolites biosynthesis, transport and catabolism</b> |      |                                                                |       |          |
| SPy0229                                                             | -    | putative ABC transporter, ATP-binding protein                  | 1.06  | 0.002317 |
| SPy0518                                                             | -    | putative ABC transporter (ATP-binding protein)                 | -1.73 | 0.011459 |
| SPy0744                                                             | -    | putative ABC transporter (ATP-binding protein)                 | -2.25 | 0.000207 |
| SPy1729                                                             | -    | putative ABC transporter (ATP-binding protein)                 | -1.16 | 0.009304 |
| SPy1749                                                             | fabG | putative beta-ketoacyl-ACP reductase                           | 1.3   | 0.001583 |
| <b>Signal transduction mechanisms</b>                               |      |                                                                |       |          |
| SPy1061                                                             | -    | putative two-component sensor histidine kinase                 | -2.61 | 0.00324  |
| <b>Transcription</b>                                                |      |                                                                |       |          |
| SPy0037                                                             | -    | hypothetical protein                                           | -1.02 | 0.015531 |
| SPy0853                                                             | -    | putative transcriptional repressor                             | -4.1  | 0.001445 |
| SPy1062                                                             | -    | putative two-component response regulator                      | -1.83 | 0.00926  |
| SPy1546                                                             | -    | hypothetical protein                                           | -5.25 | 6.97E-07 |
| SPy1755                                                             | -    | putative transcriptional regulator (MarR family)               | 1.24  | 0.003805 |
| <b>Translation, ribosomal structure and biogenesis</b>              |      |                                                                |       |          |
| SPy0071                                                             | rpmD | 50S ribosomal protein L30                                      | 1     | 0.011878 |
| SPy0145                                                             | -    | conserved hypothetical protein                                 | -1.56 | 0.001179 |
| SPy1398                                                             | -    | putative 16S pseudouridylate synthetase                        | 1.8   | 0.001886 |
| SPy1613                                                             | -    | conserved protein - function unknown                           | -2.62 | 6.24E-05 |
| <b>Virulence genes</b>                                              |      |                                                                |       |          |
| SPy0165                                                             | nga  | nicotine adenine dinucleotide glycohydrolase precursor         | -2.35 | 0.001111 |
| SPy0167                                                             | slo  | streptolysin O precursor                                       | -2.25 | 0.001306 |
| SPy0436                                                             | speJ | putative exotoxin (superantigen)                               | -1.24 | 0.003544 |
| SPy0711                                                             | speC | pyrogenic exotoxin C precursor, phage associated               | 1.54  | 0.001285 |
| SPy0712                                                             | mf2  | putative DNase (similar to mitogenic factor), phage associated | 1.69  | 0.001229 |
| SPy0737                                                             | epf  | putative extracellular matrix binding protein                  | 3.45  | 0.000494 |
| SPy0738                                                             | sagA | streptolysin S associated protein                              | -3.87 | 3.72E-06 |
| SPy1302                                                             | amyA | putative cyclomaltodextrin glucanotransferase                  | -3.44 | 1.65E-05 |
| SPy1357                                                             | grab | protein GRAB (protein G-related alpha 2M-binding protein)      | 2.41  | 5.45E-05 |
| SPy1436                                                             | mf3  | putative deoxyribonuclease                                     | 1.84  | 9.37E-06 |
| SPy1915                                                             | salA | lantibiotic precursor                                          | -1.2  | 0.033775 |
| SPy1979                                                             | ska  | streptokinase A precursor                                      | -1.5  | 0.004047 |
| SPy1983                                                             | scl  | collagen-like surface protei                                   | -5.59 | 4.94E-09 |
| SPy2016                                                             | sic  | inhibitor of complement-mediated lysis                         | -2.13 | 4.76E-07 |
| SPy2018                                                             | emm1 | M protein type 1                                               | -1.13 | 0.012141 |

|         |      |                      |       |          |
|---------|------|----------------------|-------|----------|
| SPy2039 | speB | pyrogenic exotoxin B | -2.81 | 0.000665 |
| SPy2043 | mf   | mitogenic factor     | -1.83 | 0.001632 |
| SPy2200 | hasA | hyaluronate synthase | -4.49 | 1.29E-08 |
