# Supplementary material for: Surface Export of GAPDH/SDH, a Glycolytic Enzyme, Is Essential for Streptococcus pyogenes Virulence
Source: PubMed Central journal article supplement — mBio. 2011 May 31;2(3):e00068-11. doi: 10.1128/mBio.00068-11 (PMC3104492; doi:10.1128/mbio.00068-11), 2011-05-31
Supplement: mBio.00068-11-st4.pdf [file mBio.00068-11-st4.pdf]

**Table-S4:** Comparison of microarray- and real time qRT-PCR-based gene expression profiles

| Gene    | Gene Name       | Gene function                                                 | Fold-Change (M1-SDH <sub>HBtail</sub> /M1-WT) |         |
|---------|-----------------|---------------------------------------------------------------|-----------------------------------------------|---------|
|         |                 |                                                               | Micro-array                                   | qRT-PCR |
| SPy0124 | <i>rofA</i>     | Regulatory protein                                            | 1.40                                          | 1.13    |
| SPy0128 |                 | Pilin gene                                                    | -1.33                                         | -1.36   |
| SPy0148 | <i>ntpl</i>     | V-type Na <sup>+</sup> -ATPase subunit I                      | -5.56                                         | -16.67  |
| SPy0165 | <i>nga</i>      | NAD glycohydrolase precursor                                  | -5.10                                         | 2.81    |
| SPy0167 | <i>slo</i>      | Streptolysin O                                                | -4.76                                         | -1.28   |
| SPy0252 |                 | Sugar-binding lipoprotein                                     | -3.71                                         | -1.48   |
| SPy0336 | <i>covR</i>     | Control of virulence two-component regulator                  | N.D.                                          | 1.5     |
| SPy0337 | <i>covS</i>     | Control of virulence two-component sensor kinase              | 1.28                                          | -1.5    |
| SPy0518 |                 | Putative ABC-transporter (ATP-binding protein)                | -3.31                                         | -1.42   |
| SPy0631 | <i>agaV</i>     | PTS-dependent N-acetyl galactosamine-II B                     | N.D.                                          | 2.25    |
| SPy0711 | <i>speC</i>     | Pyrogenic exotoxin C (Phage associated)                       | 2.91                                          | -1.85   |
| SPy0712 | <i>mf2</i>      | Mitogenic factor (Phage associated)                           | 3.23                                          | -1.09   |
| SPy0737 | <i>epf</i>      | Extracellular matrix-binding protein                          | 10.92                                         | 1.85    |
| SPy0738 | <i>sagA</i>     | Streptolysin S                                                | -14.65                                        | 1.4     |
| SPy1294 |                 | Maltose/maltodextrin-binding protein                          | -16.74                                        | -3.03   |
| SPy1295 | <i>malF</i>     | Maltose/maltodextrin ABC transport system                     | -14.42                                        | -1.26   |
| SPy1302 | <i>amyA</i>     | Cyclomaltodextrin glucanotransferase                          | -10.86                                        | -2.17   |
| SPy1306 | <i>malX</i>     | Maltose/maltodextrin-binding protein                          | -44.04                                        | -2.77   |
| SPy1373 | <i>ptsH</i>     | Phosphotransferase system phosphohistidine-containing protein | -3.03                                         | -1.56   |
| SPy1600 |                 | hyaluronidase                                                 | -1.82                                         | 1.82    |
| SPy1625 | <i>stk</i>      | Eukaryote-type ser/thr kinase                                 | 1.35                                          | 1.25    |
| SPy1626 | <i>stp</i>      | Eukaryote-type ser/thr phosphatase                            | 1.39                                          | 1.4     |
| SPy1718 |                 | Putative esterase                                             | -3.95                                         | 1.2     |
| SPy1755 | <i>marR</i>     | Transcriptional regulator ( <i>marR</i> family)               | 2.35                                          | -1.53   |
| SPy1815 | <i>scrA</i>     | Sucrose-specific PTS permease                                 | 1.48                                          | 2.61    |
| SPy1979 | <i>ska</i>      | streptokinase                                                 | -2.82                                         | -18.1   |
| SPy2010 | <i>scpA</i>     | C5a peptidase                                                 | -1.31                                         | -14.7   |
| SPy2016 | <i>sic</i>      | Inhibitor of complement-mediated lysis                        | -4.38                                         | -20.54  |
| SPy2018 | <i>emm1</i>     | M protein type I                                              | -2.19                                         | -1.53   |
| SPy2019 | <i>mga</i>      | M-protein transacting positive regulator                      | -1.01                                         | -1.58   |
| SPy2039 | <i>speB</i>     | Pyrogenic exotoxin B                                          | -7.01                                         | -3.22   |
| SPy2042 | <i>rgg/ropB</i> | Transcription regulator                                       | -1.11                                         | 1.1     |
| SPy2200 | <i>hasA</i>     | Hyaluronate synthase                                          | -22.42                                        | -909.0  |
| SPy2201 | <i>hasB</i>     | UDP-glucose-6-dehydrogenase                                   | -27.33                                        | -1.58   |

Shaded area indicate the genes tested for the complemented strains. see Table-S6
