# Supplementary material for: Surface Export of GAPDH/SDH, a Glycolytic Enzyme, Is Essential for Streptococcus pyogenes Virulence
Source: PubMed Central journal article supplement — mBio. 2011 May 31;2(3):e00068-11. doi: 10.1128/mBio.00068-11 (PMC3104492; doi:10.1128/mbio.00068-11), 2011-05-31
Supplement: mBio.00068-11-st5.pdf [file mBio.00068-11-st5.pdf]

Table-S5. Microarray-based differential gene regulation in PTS-related genes in M1-SDH<sub>HBtail</sub> mutant

| M1 SF370<br>SPy ORF No. | Carbohydrate transport system ( <i>gene name</i> )                              | Log <sub>2</sub> (Ratio)<br>M1-SDH <sub>HBtail</sub> /<br>M1-WT | P value                    |
|-------------------------|---------------------------------------------------------------------------------|-----------------------------------------------------------------|----------------------------|
| SPy0174                 | ascorbate-specific PTS system enzyme IIC                                        | -1.1                                                            | 0.024                      |
| SPy0252                 | Sialic acid ABC N-acetylneuraminase-binding protein                             | -1.89                                                           | 0.024                      |
| SPy0572*                | PTS system, beta-glucoside permease -specific IABC component                    | -0.93                                                           | 0.74                       |
| SPy0629-0630*           | PTS system, N-acetylgalactosamine-specific IID,C,B component                    | -0.46, +0.44                                                    | 0.38                       |
| SPy0855                 | PTS system, fructose-specific IABC component                                    | -2.27                                                           | 0.0037                     |
| SPy1057-1060            | PTS system, mannose/fructose family IIA,B,C,D component                         | -5.5, -5.6,-5.4,-4.9                                            | ≤0.0002                    |
| SPy1294-1296            | Putative maltose/maltodextrin ABC transport-, <i>malM</i> , <i>malR</i>         | -4.6,-3.85,-2.25                                                | ≤0.021                     |
| SPy1298-1301            | maltodextrin transport system permease, <i>malA</i> , <i>malD</i> , <i>malC</i> | -2.2,-2.76, -3.56                                               | ≤0.00087                   |
| SPy1306                 | maltose/maltodextrin-binding protein, <i>malX</i>                               | -5.5                                                            | 0.0005                     |
| SPy1591-1593            | putative sugar-binding transport protein                                        | -1.15, -0.5,-1.14                                               | 0.08-0.36                  |
| SPy1709-1711            | PTS system, galactose- specific IIC ,IIB, IIA component                         | -2.87,-1.96,-2.2                                                | 0.024-1.4x10 <sup>-5</sup> |
| SPy1738-1740*           | PTS system, mannose-specific component, <i>manL</i> , <i>manM</i>               | 0.11,0.19, -0.21                                                | 0.84,0.89,0.86             |
| SPy1815*                | PTS system, sucrose-specific IABC component, <i>scrA</i>                        | 0.56                                                            | 0.078                      |
| SPy1917                 | PTS system, lactose-specific IIBC component ( <i>lacE</i> )                     | -1.77                                                           | 0.006                      |
| SPy1950*                | Mannitol PTS                                                                    | -0.44                                                           | 0.62                       |
| SPy1976                 | multiple sugar-binding ABC transport system, <i>msmK</i>                        | -2.17                                                           | 0.026                      |
| SPy1986¶                | PTS system, glucose-specific IABC component                                     | -1.09                                                           | 0.16                       |
| SPy2052                 | PTS system, cellobiose-specific IABC component                                  | -1.8                                                            | 0.0005                     |
| SPy2097                 | Trehalose PTS                                                                   | -1.38                                                           | 0.0036                     |

\* Shaded rows showing non-significant change

¶ Significant change with P >0.05
