# Supplementary material for: Surface Export of GAPDH/SDH, a Glycolytic Enzyme, Is Essential for Streptococcus pyogenes Virulence
Source: PubMed Central journal article supplement — mBio. 2011 May 31;2(3):e00068-11. doi: 10.1128/mBio.00068-11 (PMC3104492; doi:10.1128/mbio.00068-11), 2011-05-31
Supplement: mBio.00068-11-st6.pdf [file mBio.00068-11-st6.pdf]

**Table-S6:** qRT-PCR-based expression profiles of selected genes in M1SDH<sub>HBtail</sub>::*sdh* vs. M1SDH<sub>HBtail</sub> and M1-WT::*sdh*<sub>HBtail</sub> vs. M1-WT.

| <b>Gene<br/>(ORF#)</b>    | <b>M1-SDH<sub>HBtail</sub><br/>vs.<br/>M1-WT</b> | <b>M1SDH<sub>HBtail</sub>::<i>sdh</i><br/>vs.<br/>M1SDH<sub>HBtail</sub></b> | <b>M1-<br/>WT::<i>sdh</i><sub>HBtail</sub><br/>vs. M1-WT</b> |
|---------------------------|--------------------------------------------------|------------------------------------------------------------------------------|--------------------------------------------------------------|
|                           | <b>Mean±s.d</b>                                  | <b>Mean±s.d</b>                                                              | <b>Mean±s.d</b>                                              |
| <b><i>ska</i>(1979)</b>   | 0.0552±0.031                                     | 2.4±1.8                                                                      | 0.73±0.06                                                    |
| <b><i>emm</i> (2019)</b>  | 0.63                                             | 0.74±0.1                                                                     | 0.64                                                         |
| <b><i>mga</i> (2018)</b>  | 0.65                                             | 0.5617±0.06                                                                  | 0.65                                                         |
| <b><i>scpA</i>(2010)</b>  | 0.068±0.04                                       | 0.7137±0.07                                                                  | 0.172±0.101                                                  |
| <b><i>sic</i>(2016)</b>   | 0.05±0.02                                        | 1.0±0.1                                                                      | 0.66±0.2                                                     |
| <b><i>speB</i> (2039)</b> | 0.31±0.058                                       | 0.0773±0.00851                                                               | 0.014±0.0035                                                 |
| <b><i>mf</i>(712)</b>     | 0.047±0.024                                      | 2.209±0.2841                                                                 | 0.091±0.046                                                  |
| <b><i>amyA</i>(1302)</b>  | 0.46±0.2                                         | 1.0±0.089                                                                    | 0.135±0.073                                                  |
| <b><i>hasA</i>(2200)</b>  | 0.0011±0.000062                                  | 0.8343±0.1                                                                   | 0.102±0.064                                                  |
| <b><i>malX</i>(1294)</b>  | 0.36±0.20                                        | 1.8±0.3                                                                      | 0.21±0.14                                                    |
